# Supplementary material
Source: publisher figshare collection journal article supplement (https://sage.figshare.com/ndownloader/files/36191759)
Supplement: Supplementary file 1 [file 36191759]

# Reporting checklist for diagnostic test accuracy study.

Based on the STARD guidelines.

| Reporting Item           |                    |                                                                                                                                                                                                                                                                                   | Page Number |
|--------------------------|--------------------|-----------------------------------------------------------------------------------------------------------------------------------------------------------------------------------------------------------------------------------------------------------------------------------|-------------|
| <b>Title or abstract</b> |                    |                                                                                                                                                                                                                                                                                   |             |
| None                     | <a href="#">#1</a> | Identification as a study of diagnostic accuracy using at least one measure of accuracy (such as sensitivity, specificity, predictive values, or AUC)                                                                                                                             | Pag. 1, 4   |
| <b>Abstract</b>          |                    |                                                                                                                                                                                                                                                                                   |             |
| None                     | <a href="#">#2</a> | Structured summary of study design, methods, results, and conclusions (for specific guidance, see STARD for Abstracts <a href="https://www.equator-network.org/reporting-guidelines/stard-abstracts/">https://www.equator-network.org/reporting-guidelines/stard-abstracts/</a> ) | Pag. 4      |
| <b>Introduction</b>      |                    |                                                                                                                                                                                                                                                                                   |             |
| None                     | <a href="#">#3</a> | Scientific and clinical background, including the intended use and clinical role of the index test                                                                                                                                                                                | Pag. 5      |
| None                     | <a href="#">#4</a> | Study objectives and hypotheses                                                                                                                                                                                                                                                   | Pag. 5      |
| <b>Methods</b>           |                    |                                                                                                                                                                                                                                                                                   |             |
| Study design             | <a href="#">#5</a> | Whether data collection was planned before the index test and reference standard were performed (prospective study) or after (retrospective study)                                                                                                                                | n/a         |
| Participants             | <a href="#">#6</a> | Eligibility criteria                                                                                                                                                                                                                                                              | Pag. 7      |
| Participants             | <a href="#">#7</a> | On what basis potentially eligible participants were identified (such as symptoms, results from previous tests, inclusion in registry)                                                                                                                                            | Pag. 7      |

|                |                     |                                                                                                                                                                                                                                         |           |
|----------------|---------------------|-----------------------------------------------------------------------------------------------------------------------------------------------------------------------------------------------------------------------------------------|-----------|
| Participants   | <a href="#">#8</a>  | Where and when potentially eligible participants were identified (setting, location and dates)                                                                                                                                          | Pag. 7, 8 |
| Participants   | <a href="#">#9</a>  | Whether participants formed a consecutive, random or convenience series                                                                                                                                                                 | Pag. 8    |
| Test methods   | <a href="#">#10</a> | Index and reference tests in sufficient detail to allow replication                                                                                                                                                                     | Pag. 8    |
| Test methods   | <a href="#">#11</a> | Rationale for choosing the reference standard (if alternatives exist)                                                                                                                                                                   | n/a       |
| Test methods   | <a href="#">#12</a> | Definition of and rationale for test positivity cut-offs or result categories of the index and reference tests, distinguishing pre-specified from exploratory                                                                           | Pag. 7, 8 |
| Test methods   | <a href="#">#13</a> | Whether clinical information and reference standard results were available to the performers / readers of the index test; Whether clinical information and index test results were available to the assessors of the reference standard | n/a       |
| Analysis       | <a href="#">#14</a> | Methods for estimating or comparing measures of diagnostic accuracy                                                                                                                                                                     | Pag. 8    |
| Analysis       | <a href="#">#15</a> | How indeterminate index test or reference standard results were handled                                                                                                                                                                 | Pag. 8    |
| Analysis       | <a href="#">#16</a> | How missing data on the index test and reference standard were handled                                                                                                                                                                  | n/a       |
| Analysis       | <a href="#">#17</a> | Any analyses of variability in diagnostic accuracy, distinguishing pre-specified from exploratory                                                                                                                                       | n/a       |
| Analysis       | <a href="#">#18</a> | Intended sample size and how it was determined                                                                                                                                                                                          | n/a       |
| <b>Results</b> |                     |                                                                                                                                                                                                                                         |           |
| Participants   | <a href="#">#19</a> | Flow of participants, using a diagram                                                                                                                                                                                                   | n/a       |
| Participants   | <a href="#">#20</a> | Baseline demographic and clinical characteristics of participants                                                                                                                                                                       | Pag. 9    |

|                          |                     |                                                                                                                                                         |             |
|--------------------------|---------------------|---------------------------------------------------------------------------------------------------------------------------------------------------------|-------------|
| Participants             | <a href="#">#21</a> | Distribution of severity of disease in those with the target condition, and distribution of alternative diagnoses in those without the target condition | Pag. 9      |
| Participants             | <a href="#">#22</a> | Time interval and any clinical interventions between index test and reference standard                                                                  | n/a         |
| Test results             | <a href="#">#23</a> | Cross tabulation of the index test results (or their distribution) by the results of the reference standard                                             | n/a         |
| Test results             | <a href="#">#24</a> | Estimates of diagnostic accuracy and their precision (such as 95% confidence intervals)                                                                 | Pag. 9      |
| Test results             | <a href="#">#25</a> | Any adverse events from performing the index test or the reference standard                                                                             | Pag. 9      |
| <b>Discussion</b>        |                     |                                                                                                                                                         |             |
| None                     | <a href="#">#26</a> | Study limitations, including sources of potential bias, statistical uncertainty, and generalisability                                                   | Pag. 11     |
| None                     | <a href="#">#27</a> | Implications for practice, including the intended use and clinical role of the index test                                                               | Pag. 10, 11 |
| <b>Other information</b> |                     |                                                                                                                                                         |             |
| None                     | <a href="#">#28</a> | Registration number and name of registry                                                                                                                | n/a         |
| None                     | <a href="#">#29</a> | Where the full study protocol can be accessed                                                                                                           | n/a         |
| None                     | <a href="#">#30</a> | Sources of funding and other support; role of funders                                                                                                   | Pag. 12     |

None The STARD checklist is distributed under the terms of the Creative Commons Attribution License CC-BY. This checklist can be completed online using <https://www.goodreports.org/>, a tool made by the [EQUATOR Network](#) in collaboration with [Penelope.ai](#)
